# Supplementary material
Source: PubMed Central journal article supplement (PMC2966956)
Supplement: embor2010153-s1.pdf [file embor2010153-s1.pdf]

## SUPPLEMENTARY INFORMATION

### CDK9-Cyclin K Functions in the Replication Stress Response

David S. Yu<sup>1</sup>, Runxiang Zhao<sup>2</sup>, Emory Hsu<sup>2</sup>, Jennifer Cayer<sup>1</sup>, Fei Ye<sup>3</sup>, Yan Guo<sup>3</sup>, Yu Shyr<sup>3</sup>, & David Cortez<sup>2+</sup>

<sup>1</sup>Departments of Radiation Oncology, <sup>2</sup>Biochemistry, and <sup>3</sup>Biostatistics

Vanderbilt University Medical Center

2215 Garland Avenue

Nashville, TN 37232

<sup>+</sup>Corresponding author. Tel: +1 615 322 8547; Fax: +1 615 343 0704

E-mail: david.cortez@vanderbilt.edu

#### **Contains:**

Supplementary methods

Supplementary figure legends

Supplemental figures S1-S5

Supplemental tables S1 and S2

## **SUPPLEMENTARY METHODS**

Individual siRNAs were purchased from Dharmacon or Qiagen. These sequences were as follows:

CDK9-1 (CGGCCAGAAGGTGGCTCTGAA)

CDK9-2 (TAGGGACATGAAGGCTGCTAA)

CDK9-3 (TGGGCACAGTTTGGTCCGTTA)

CDK9-4 (GACGTCCATGTTTCGAGTACT)

CCNK-1 (ATCCTGGATCTTTACTCACAA)

CCNK-2 (AAGCAACTCAAAGGTGATAAA)

CCNK-3 (CAGCCATATTGGCTCAATAAA)

CCNK-4 (AGCCATGTTGGTACTGGGATA)

CCNT1-1 (GACAAGCAACTTAGCACATAA)

CCNT1-2 (ACCCAGACAATAGACTATCAA)

CCNT1-3 (AGGCTTTGAACTAACAATTGA)

CCNT1-4 (TTGGAACATGTCATCAAGGTA)

CCNT2-1 (CTCGATGTAAGGGATCATTAT)

CCNT2-2 (CACCCCTCGTGAAACTGGACAA)

CCNT2-3 (CTGCGGAGTGGAGGCGGATAA)

CCNT2-4 (TGGGAATATGTGGATCCTACA)

Antibodies were purchased from Covance: HA.11; Santa Cruz: ATR (N-19), cyclin T1 (T-18), cyclin T2a/b (S-14), PCNA (FL-261 and PC10); Abcam: claspin (ab3720); Cell Signaling: RPA70 (2267); Bethyl Labs: RPA32 (A300-244A); BD Pharmingen: ORC2

(551178 and 559266); and Millipore: GAPDH (6C5). Rabbit anti-cyclin K (aa 383-400) and anti-CDK9 (aa 329-346) peptide antibodies were custom generated through Open Biosystems.

**Microarray analyses.** U2OS cells were transfected with NT or CDK9-3 siRNA for 72 hours, treated with or without 3 mM HU for 20 hours, and harvested for RNA extraction using RNeasy mini kit (Qiagen). Targets were prepared with the two-cycle cDNA kit with the WT terminal labelling kit (Affymetrix) and hybridized to the Affymetrix GeneChip Human Exon 1.0 ST Array for genome wide exon level expression profiling and analyzed according to the manufacturer's instructions. Transfections were performed in triplicate. Microarray analysis was done using Linear Model for Microarray Data (LIMMA)(Wettenhall & Smyth, 2004).

## **SUPPLEMENTARY FIGURE LEGENDS**

**Supplementary Fig S1** | Primary screen flow diagram. The screen was completed in duplicate, hits ranked by the ratio of the HU-treated to untreated values for each siRNA pool, and analyzed by the weighted flexible compound covariate method (WFCCM). Candidate RSR genes were validated repeating the screen with four individual siRNAs for each gene. Validated genes are listed in Table S1.

**Supplementary Fig S2** | Depletion of CDK9 does not affect cell proliferation or apoptosis in the absence of exogenous damage. (A) U2OS cells were transfected with NT or CDK9-3 siRNA and assayed for cell proliferation with WST-1 reagent (Roche) 120

hours after transfection. Mean and standard deviation from four replicas is shown. **(B)** U2OS cells were treated with or without 150 nM camptothecin for 20 hours or transfected with NT or CDK9-3 siRNA for the indicated time points. Propidium iodide (PI) and annexin V-FITC staining (BD Pharmingen) was analyzed by flow cytometry. Percentage of cells staining positive for annexin V is shown.

**Supplementary Fig S3** | Depletion of Cyclin T1 and T2 does not impair cell cycle recovery following replication stress. **(A,B)** U2OS cells were transfected with NT or both Cyclin T1 and Cyclin T2 siRNA, treated with 3 mM HU for 20 hours, and released into nocodazole for 10 hours. DNA content was analyzed by flow cytometry. **(B)** The percentage (mean and standard deviation) of cells that completed DNA synthesis in three replicate experiments is shown.

**Supplementary Fig S4** | CDK9 is not required for ATR-dependent CHK1 activation but it does regulate CDC25A protein levels. **(A)** Immunoblot analysis of U2OS cells transfected with NT, ATR, or CDK9-3 siRNA and treated with 3 mM HU for 6 hours. **(B)** Immunoblot analysis of U2OS cells transfected with the NT, ATR, or CDK9-3 siRNA and treated with 3mM HU for 2h. Lanes 4 and 8 are lysates from cells expressing an siRNA resistant CDK9 cDNA. Cells were harvested 72 hours after transfection with 0.5% NP-40 lysis buffer, separated by SDS-PAGE, and probed with the indicated antibodies. (\* = crossreacting protein)

**Supplementary Fig S5** | Inactivation of CDK9 with flavopiridol or DRB impairs cell cycle recovery. (A) Schematic of cell cycle recovery assay. (B/C) U2OS cells were incubated with 50 nM flavopiridol (FP), 25  $\mu$ M DRB, or no drug for 1 hour prior to and during the recovery assay. Cells were treated with 3 mM HU for 20 hours and released into nocodazole for 10 hours prior to analyzing for DNA content by flow cytometry. Mean and standard deviation from three replicas is shown. \* indicates  $p < 0.05$ .

**Supplementary Table S1** | Validated hits from primary screen.

**Supplementary Table S2** | Summary of microarray gene expression analysis following CDK9-silencing and/or treatment with HU. NT, non-targeting.

## Reference

Wettenhall JM, Smyth GK (2004) limmaGUI: a graphical user interface for linear modeling of microarray data. *Bioinformatics* **20**: 3705-3706

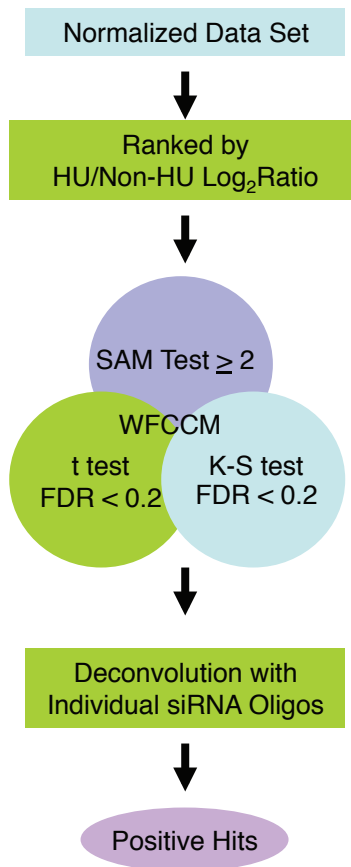

**Figure S1**

**A**

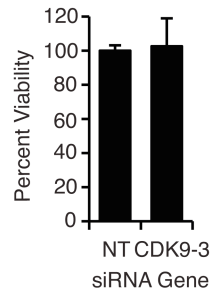

**B**

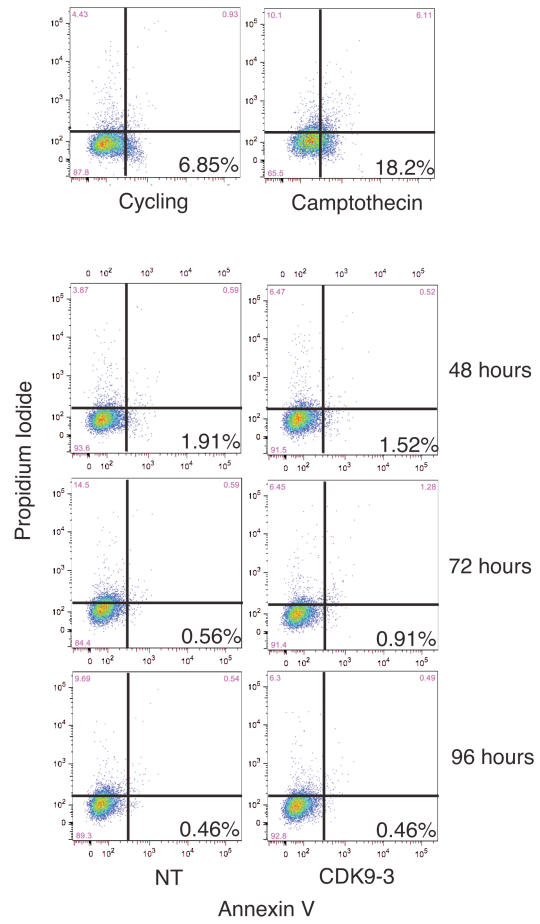

**Figure S2**

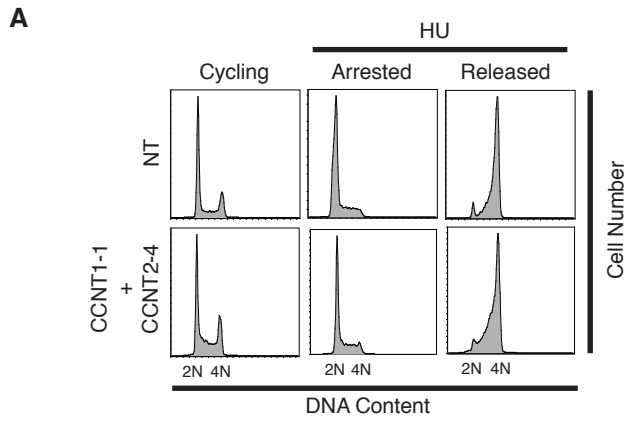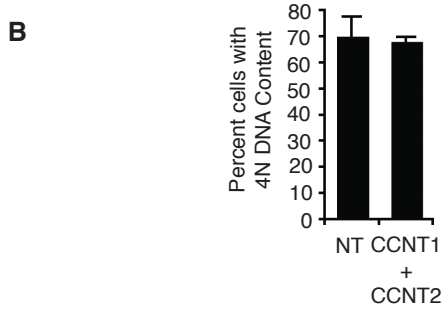

**Figure S3**



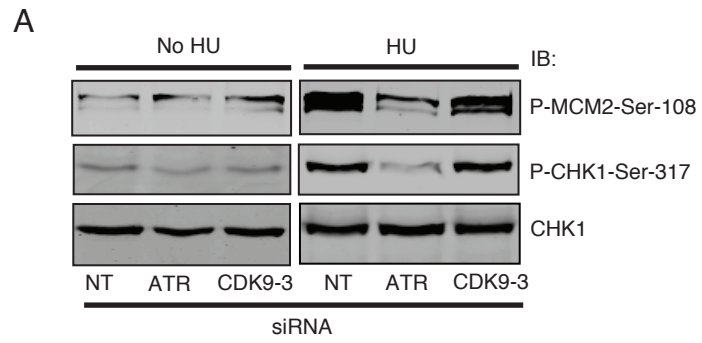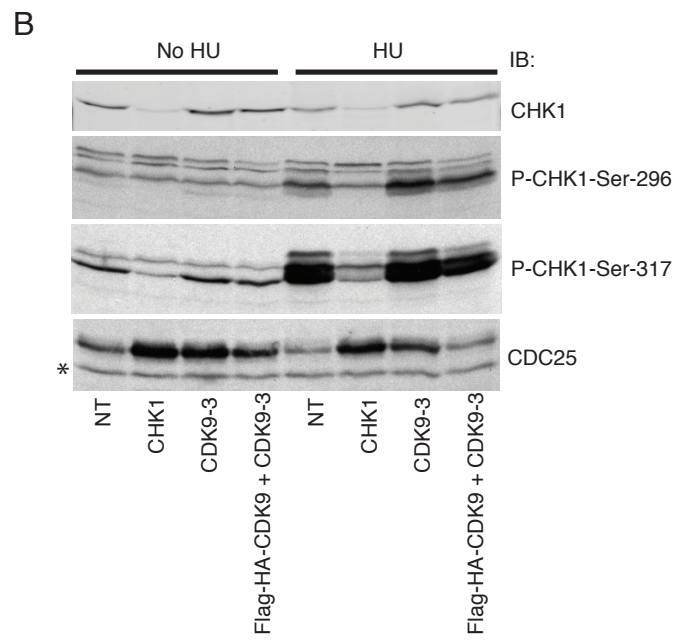

**Figure S4**

**A**

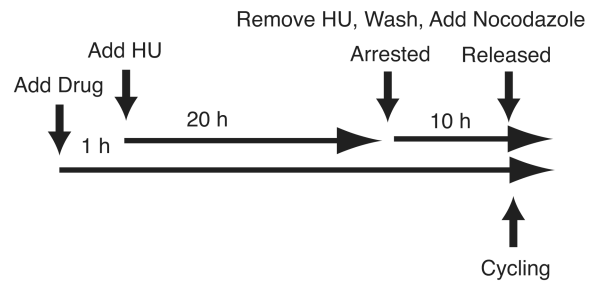

**B**

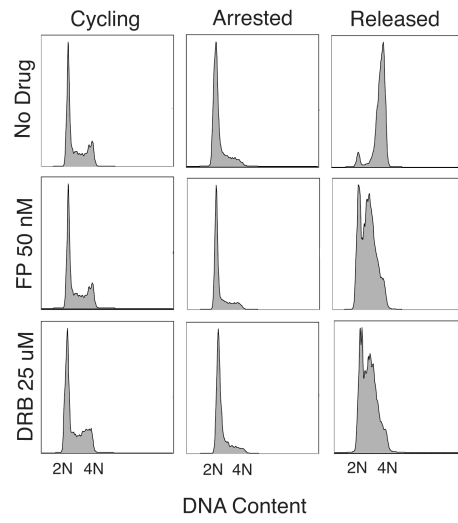

**C**

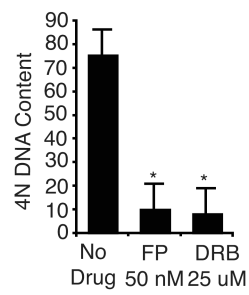

**Figure S5**

**Supplementary Table S1**

**Validated HU Sensitivity Genes**

| Gene     | Description                                                                                         | Accession                                                             | # siRNA Positive/siRNA Tested |
|----------|-----------------------------------------------------------------------------------------------------|-----------------------------------------------------------------------|-------------------------------|
| AATK     | apoptosis-associated tyrosine kinase                                                                | NM_001080395 XM_001128317 XM_927215                                   | 2 of 4                        |
| AKT2     | v-akt murine thymoma viral oncogene homolog 2                                                       | NM_001626                                                             | 3 of 4                        |
| AKTIP    | AKT interacting protein                                                                             | NM_001012398 NM_022476                                                | 3 of 4                        |
| ARFGEF2  | ADP-ribosylation factor guanine nucleotide-exchange factor 2 (brefeldin A-inhibited)                | NM_006420                                                             | 3 of 4                        |
| AURKB    | aurora kinase B                                                                                     | NM_004217                                                             | 3 of 4                        |
| BMP1     | bone morphogenetic protein 1                                                                        | NM_001199 NM_006128 NM_006129 NM_006130 NM_006131 NM_006132           | 2 of 4                        |
| CD40LG   | CD40 ligand                                                                                         | NM_000074                                                             | 2 of 4                        |
| CD70     | CD70 molecule                                                                                       | NM_001252                                                             | 3 of 4                        |
| CDC2L2   | cell division cycle 2-like 2 (PITSLRE proteins)                                                     | NM_024011 NM_033527 NM_033528 NM_033529 NM_033531 NM_033532           | 2 of 4                        |
| CDH5     | cadherin 5, type 2 (vascular endothelium)                                                           | NM_001114117 NM_001795                                                | 2 of 4                        |
| CDK5RAP1 | CDK5 regulatory subunit associated protein 1                                                        | NM_016082 NM_016408                                                   | 4 of 4                        |
| CDK9     | cyclin-dependent kinase 9                                                                           | NM_001261                                                             | 4 of 4                        |
| CDKL1    | cyclin-dependent kinase-like 1 (CDC2-related kinase)                                                | NM_004196                                                             | 2 of 4                        |
| CDKN1B   | cyclin-dependent kinase inhibitor 1B (p27, Kip1)                                                    | NM_004064                                                             | 2 of 4                        |
| CDKN3    | cyclin-dependent kinase inhibitor 3 (CDK2-associated dual specificity phosphatase)                  | NM_005192                                                             | 3 of 4                        |
| CNNM2    | cyclin M2                                                                                           | NM_017649 NM_199076 NM_199077                                         | 3 of 4                        |
| DYNLL1   | dynein, light chain, LC8-type 1                                                                     | NM_001037494 NM_001037495 NM_003746                                   | 3 of 4                        |
| EDN1     | endothelin 1                                                                                        | NM_001955                                                             | 3 of 4                        |
| ESRRA    | estrogen-related receptor alpha                                                                     | NM_004451                                                             | 2 of 4                        |
| FCRL2    | Fc receptor-like 2                                                                                  | NM_030764 NM_138738 NM_138739                                         | 2 of 4                        |
| FGFR2    | fibroblast growth factor receptor 2                                                                 | NM_000141 NM_022969 NM_022970 NM_022971 NM_022972 NM_022973 NM_022974 | 2 of 4                        |
| FKBP1A   | FK506 binding protein 1A, 12kDa                                                                     | NM_000801                                                             | 2 of 4                        |
| FRS3     | fibroblast growth factor receptor substrate 3                                                       | NM_006653                                                             | 2 of 4                        |
| FRZB     | frizzled-related protein                                                                            | NM_001463                                                             | 2 of 4                        |
| GAS8     | growth arrest-specific 8                                                                            | NM_001481 NR_023348                                                   | 2 of 4                        |
| GCKR     | glucokinase (hexokinase 4) regulator                                                                | NM_001486                                                             | 3 of 4                        |
| GP6      | glycoprotein VI (platelet)                                                                          | NM_001083899 NM_016363                                                | 2 of 4                        |
| GRB2     | growth factor receptor-bound protein 2                                                              | NM_002086 NM_203506                                                   | 3 of 4                        |
| GTF3C2   | general transcription factor IIIC, polypeptide 2, beta 110kDa                                       | NM_001035521 NM_001521                                                | 3 of 4                        |
| GUCA1A   | guanylate cyclase activator 1A (retina)                                                             | NM_000409                                                             | 2 of 4                        |
| HERC1    | hect (homologous to the E6-AP (UBE3A) carboxyl terminus) domain and RCC1 (CHC1)-like domain (RLD) 1 | NM_003922                                                             | 2 of 4                        |
| HUS1     | HUS1 checkpoint homolog (S. pombe)                                                                  | NM_004507                                                             | 3 of 4                        |
| IFNA14   | interferon, alpha 14                                                                                | NM_002172                                                             | 2 of 4                        |
| IL18R1   | interleukin 18 receptor 1                                                                           | NM_003855                                                             | 3 of 4                        |
| IL4      | interleukin 4                                                                                       | NM_000589 NM_172348                                                   | 2 of 4                        |
| INPPL1   | inositol polyphosphate phosphatase-like 1                                                           | NM_001567                                                             | 2 of 4                        |
| INSRR    | insulin receptor-related receptor                                                                   | NM_014215                                                             | 2 of 4                        |
| IQGAP2   | IQ motif containing GTPase activating protein 2                                                     | NM_006633                                                             | 2 of 4                        |
| KIF11    | kinesin family member 11                                                                            | NM_004523                                                             | 2 of 4                        |
| KIF1C    | kinesin family member 1C                                                                            | NM_006612                                                             | 3 of 4                        |
| MPHOSPH1 | M-phase phosphoprotein 1                                                                            | NM_016195                                                             | 3 of 4                        |
| KIF26A   | kinesin family member 26A                                                                           | NM_015656 XM_050278 XM_941210                                         | 3 of 4                        |
| MAPK15   | mitogen-activated protein kinase 15                                                                 | NM_139021                                                             | 4 of 4                        |
| MLL5     | myeloid/lymphoid or mixed-lineage leukemia 5 (trithorax homolog, Drosophila)                        | NM_018682 NM_182931                                                   | 2 of 4                        |
| NID2     | nidogen 2 (osteonidogen)                                                                            | NM_007361                                                             | 4 of 4                        |
| NUAK2    | NUAK family, SNF1-like kinase, 2                                                                    | NM_030952                                                             | 2 of 4                        |
| PPP2R3B  | protein phosphatase 2 (formerly 2A), regulatory subunit B", beta                                    | NM_013239 NM_199326                                                   | 2 of 4                        |
| PTMA     | prothymosin, alpha                                                                                  | NM_001099285 NM_002823                                                | 2 of 4                        |
| RAD17    | RAD17 homolog (S. pombe)                                                                            | NM_002873 NM_133338 NM_133339 NM_133340 NM_133341 NM_133342 NM_133343 | 4 of 4                        |
| RBKS     | ribokinase                                                                                          | NM_133344                                                             | 2 of 4                        |
| RNF31    | ring finger protein 31                                                                              | NM_022128                                                             | 2 of 4                        |
| ROBO1    | roundabout, axon guidance receptor, homolog 1 (Drosophila)                                          | NM_017999                                                             | 2 of 4                        |
| SEMA3F   | sema domain, immunoglobulin domain (Ig), short basic domain, secreted, (semaphorin) 3F              | NM_002941 NM_133631                                                   | 2 of 4                        |
| SIVA1    | SIVA1, apoptosis-inducing factor                                                                    | NM_004186                                                             | 2 of 4                        |
| SRMS     | src-related kinase lacking C-terminal regulatory tyrosine and N-terminal myristylation sites        | NM_006427 NM_021709                                                   | 3 of 4                        |
| SRPK1    | SFRS protein kinase 1                                                                               | NM_080823                                                             | 3 of 4                        |
| TPRXL    | tetra-peptide repeat homeobox-like                                                                  | NM_003137                                                             | 3 of 4                        |
| TUSC4    | tumor suppressor candidate 4                                                                        | NR_002223 XM_496631                                                   | 2 of 4                        |
| VPS72    | vacuolar protein sorting 72 homolog (S. cerevisiae)                                                 | NM_006545                                                             | 3 of 4                        |
| XCL2     | chemokine (C motif) ligand 2                                                                        | NM_005997                                                             | 2 of 4                        |
|          |                                                                                                     | NM_003175                                                             | 2 of 4                        |

## Supplementary Table S2

## CDK9 vs NT Downregulated (&gt; 1.5 FC, P &lt; 0.05)

| Gene      | P Value  | FC        |
|-----------|----------|-----------|
| SEMA3A    | 0.003598 | -3.684497 |
| CDK9      | 1.83E-05 | -3.522216 |
| CFI       | 0.021754 | -3.220309 |
| OLR1      | 0.012776 | -3.167604 |
| HRSP12    | 1.91E-05 | -2.938401 |
| C4orf18   | 0.005152 | -2.845392 |
| SLC40A1   | 0.002693 | -2.666496 |
| CFH       | 0.00176  | -2.664318 |
| COL5A2    | 0.000993 | -2.455569 |
| COL3A1    | 0.013921 | -2.41393  |
| LOC221442 | 0.016566 | -2.178884 |
| PGM2L1    | 0.005963 | -2.115445 |
| C12orf59  | 0.036429 | -2.108929 |
| MMP2      | 0.01481  | -1.93911  |
| HMOX1     | 0.013598 | -1.920059 |
| P4HB      | 0.000157 | -1.912421 |
| P4HB      | 1.69E-05 | -1.901226 |
| BDKRB1    | 0.002224 | -1.881275 |
| SERPINE1  | 1.08E-05 | -1.881051 |
| VEGFC     | 0.001221 | -1.879586 |
| FER1L3    | 0.002018 | -1.879555 |
| RDH10     | 0.045035 | -1.875367 |
| NAV3      | 0.00123  | -1.871011 |
| AHR       | 0.036731 | -1.8636   |
| FOSL2     | 0.002277 | -1.826931 |
| PCDHB2    | 0.027791 | -1.811224 |
| ENPP1     | 0.043874 | -1.805319 |
| CPM       | 0.042754 | -1.783323 |
| MAOB      | 0.028223 | -1.781678 |
| GALNT13   | 0.032585 | -1.757209 |
| FN1       | 0.001266 | -1.755379 |
| RAB30     | 0.003767 | -1.754904 |
| RSP03     | 0.012365 | -1.743148 |
| RIMS1     | 0.022442 | -1.736452 |
| PLA2G7    | 0.047668 | -1.735862 |
| MICA      | 0.018422 | -1.708783 |
| DOCK4     | 0.020035 | -1.705338 |
| ZNF286A   | 0.008454 | -1.698361 |
| ARHGAP12  | 0.016042 | -1.694528 |
| CDH11     | 0.037244 | -1.678821 |
| TMTC2     | 0.005516 | -1.676778 |
| PLAGL2    | 0.002375 | -1.667906 |
| USP28     | 0.031698 | -1.651487 |
| PPIL3     | 0.028313 | -1.650169 |
| SRGAP1    | 0.002148 | -1.647791 |
| SGK1      | 0.02689  | -1.635955 |
| BAMBI     | 0.017872 | -1.632652 |
| SLC16A2   | 0.031217 | -1.625997 |
| RAB35     | 0.03392  | -1.625896 |
| ANKRD27   | 0.023379 | -1.616565 |
| MICA      | 0.011061 | -1.61258  |
| GTDC1     | 0.013785 | -1.594923 |
| AGPAT9    | 0.005688 | -1.591895 |
| VKORC1    | 0.048971 | -1.587391 |
| URM1      | 0.015721 | -1.564548 |
| SLC29A4   | 0.034076 | -1.563697 |
| LTBP1     | 0.027394 | -1.550741 |
| MAP3K13   | 0.009804 | -1.536649 |
| CENTD1    | 0.039704 | -1.521095 |
| KITLG     | 0.045522 | -1.513783 |
| SOCS2     | 0.010494 | -1.508974 |

## CDK9 vs NT Upregulated (&gt; 1.5 FC, P &lt; 0.05)

| Gene      | P Value  | FC       |
|-----------|----------|----------|
| LCP1      | 4.84E-10 | 4.403857 |
| SPP1      | 0.001362 | 2.822405 |
| C12orf39  | 0.001451 | 2.456706 |
| FAM70A    | 0.026043 | 2.309297 |
| MLLT11    | 0.002486 | 2.264048 |
| CD274     | 0.000492 | 2.185713 |
| ITGA6     | 7.86E-06 | 2.139149 |
| PDGFC     | 0.004012 | 2.124432 |
| PLSCR4    | 0.007278 | 2.087193 |
| IL8       | 0.040233 | 2.062742 |
| GLP2R     | 0.007336 | 2.001267 |
| RND3      | 0.002643 | 1.984142 |
| SLC7A2    | 1.31E-05 | 1.965125 |
| MAP1A     | 0.000425 | 1.94641  |
| CLGN      | 0.033417 | 1.916079 |
| PSG3      | 0.028668 | 1.895225 |
| SLC1A4    | 0.000612 | 1.892018 |
| FST       | 0.04532  | 1.86305  |
| KIAA0825  | 0.014728 | 1.857232 |
| ANXA3     | 0.000358 | 1.854734 |
| UCA1      | 0.00363  | 1.853163 |
| TRIM16L   | 7.43E-05 | 1.844131 |
| TAGLN     | 0.015004 | 1.842838 |
| PRKACB    | 0.027019 | 1.819584 |
| ANKRD46   | 0.001095 | 1.81701  |
| MT1E      | 0.006285 | 1.795497 |
| SCML1     | 0.005564 | 1.791898 |
| FBXO4     | 0.021567 | 1.787957 |
| LAMB3     | 0.001969 | 1.783417 |
| CYP4F11   | 0.036659 | 1.756668 |
| HMMR      | 0.047745 | 1.755569 |
| EGF       | 0.000855 | 1.721539 |
| SLC7A11   | 0.002616 | 1.720378 |
| GPX3      | 0.038056 | 1.71857  |
| SAR1B     | 0.020355 | 1.684864 |
| HSDL2     | 0.01576  | 1.677435 |
| C14orf149 | 0.018637 | 1.670776 |
| CTH       | 0.01306  | 1.66072  |
| SCML2     | 0.002251 | 1.655009 |
| MFAP3     | 0.010227 | 1.644087 |
| RWDD2B    | 0.007148 | 1.642076 |
| TMEM64    | 0.01109  | 1.63594  |
| GLIPR1    | 0.003392 | 1.632322 |
| PHF11     | 0.029983 | 1.630393 |
| PAPPA     | 0.043226 | 1.630003 |
| GNAQ      | 0.027839 | 1.628429 |
| SERPINB5  | 0.020585 | 1.627878 |
| CDC6      | 0.014046 | 1.619322 |
| VGLL3     | 0.022233 | 1.613095 |
| PCGF5     | 0.038693 | 1.608963 |
| LRP8      | 0.02336  | 1.608455 |
| SLC16A12  | 0.041824 | 1.604049 |
| TMEM194B  | 0.010153 | 1.602314 |
| EPB41L4B  | 0.008986 | 1.601983 |
| TLR6      | 0.019051 | 1.597534 |
| NUP210    | 0.015042 | 1.58929  |
| ARL5B     | 0.018423 | 1.585456 |
| SEC23A    | 0.029234 | 1.568435 |
| NETO1     | 0.047937 | 1.562103 |
| GK        | 0.044246 | 1.557671 |
| C1orf97   | 0.036366 | 1.556133 |
| MOSC1     | 0.033985 | 1.552395 |
| HECW1     | 0.01288  | 1.548718 |
| CALB2     | 0.015228 | 1.547633 |
| HTATIP2   | 0.024344 | 1.538195 |
| TRIM16    | 0.040463 | 1.53376  |
| TMEM194B  | 0.008796 | 1.523502 |
| RECK      | 0.041932 | 1.521872 |
| ASPH      | 0.007729 | 1.519095 |
| WDR69     | 0.0443   | 1.51645  |
| CHORDC1   | 0.038267 | 1.509755 |
| DIRC2     | 0.036011 | 1.507962 |
| CHST4     | 0.040687 | 1.507233 |
| DPY19L1   | 0.005768 | 1.505088 |
| SLC26A2   | 0.019055 | 1.503375 |
| RMND5A    | 0.01387  | 1.500242 |

## CDK9-HU vs NT-HU Downregulated (&gt; 1.5 FC, P &lt; 0.05)

| Gene      | P Value  | FC        |
|-----------|----------|-----------|
| CDK9      | 2.5E-09  | -3.894835 |
| SEMA3A    | 6.62E-10 | -3.183837 |
| HRSP12    | 8.85E-08 | -3.031601 |
| COL5A2    | 2.61E-09 | -2.756143 |
| SEPP1     | 9.77E-05 | -2.701809 |
| CFH       | 9.97E-08 | -2.70052  |
| CFI       | 2.29E-07 | -2.621053 |
| SLC40A1   | 1.08E-06 | -2.611364 |
| OLR1      | 4.84E-08 | -2.424885 |
| FBXO32    | 2E-07    | -2.393501 |
| C3AR1     | 6.73E-08 | -2.378275 |
| NOV       | 4.78E-07 | -2.344247 |
| COL3A1    | 4.93E-08 | -2.237979 |
| C4orf18   | 9.88E-08 | -2.199312 |
| PCDHB5    | 7.32E-08 | -1.999496 |
| PLXDC2    | 1.34E-07 | -1.992466 |
| OLR1      | 1.37E-06 | -1.986137 |
| PRR16     | 9.91E-05 | -1.983301 |
| TRIB2     | 2.2E-07  | -1.970495 |
| RCAN2     | 7.63E-08 | -1.969182 |
| COL6A3    | 8.1E-06  | -1.968324 |
| NAV3      | 1.34E-07 | -1.96173  |
| PCDHB12   | 7.46E-06 | -1.954908 |
| TCP11L2   | 1.37E-05 | -1.940063 |
| RG54      | 1.74E-06 | -1.909203 |
| ZNF354B   | 0.000135 | -1.906793 |
| KCNK1     | 2.69E-07 | -1.906636 |
| PCDHB11   | 1.46E-06 | -1.894356 |
| BAMBI     | 1.4E-06  | -1.891722 |
| ID2       | 0.000817 | -1.889275 |
| HAS2      | 5.47E-06 | -1.878788 |
| PCDHB16   | 9.41E-06 | -1.875992 |
| BMP4      | 3.51E-06 | -1.874667 |
| PCDHB18   | 1.02E-05 | -1.848271 |
| PCDHB2    | 6.97E-07 | -1.842822 |
| TMTC2     | 3.29E-06 | -1.835365 |
| TXNIP     | 6.83E-07 | -1.830029 |
| PGM2L1    | 1.69E-06 | -1.825465 |
| IFIT1     | 2.53E-05 | -1.821213 |
| XCCL14    | 3.2E-06  | -1.814765 |
| AHNAK2    | 3.01E-07 | -1.812088 |
| LRRN1     | 9.23E-07 | -1.80285  |
| RORB      | 6.99E-07 | -1.792289 |
| MAOB      | 3.13E-06 | -1.78889  |
| A2M       | 9.97E-07 | -1.767853 |
| MMP2      | 1.47E-06 | -1.761615 |
| PCDHB3    | 0.000899 | -1.759581 |
| FN1       | 3.1E-06  | -1.750297 |
| FER1L3    | 5.99E-07 | -1.749797 |
| TSHZ2     | 3.53E-07 | -1.741246 |
| TUBA1A    | 7.16E-07 | -1.740297 |
| HSD17B3   | 2.67E-06 | -1.737192 |
| ADAMTS5   | 2.23E-05 | -1.722494 |
| TDHMT2    | 1.56E-06 | -1.720786 |
| SFRP1     | 6.07E-06 | -1.718555 |
| FLG       | 0.000489 | -1.717105 |
| GJA1      | 3.61E-06 | -1.696043 |
| PDE5A     | 1.14E-05 | -1.69559  |
| RDH10     | 6.17E-06 | -1.692526 |
| SLC1A3    | 3.26E-05 | -1.685935 |
| KLK6      | 4.89E-07 | -1.682824 |
| PLEKHG1   | 0.000135 | -1.680593 |
| VAMP1     | 3.22E-06 | -1.671029 |
| FAM46C    | 9.87E-07 | -1.670981 |
| SNORD59B  | 0.00015  | -1.666935 |
| ESM1      | 1.25E-05 | -1.665918 |
| P4HB      | 1.39E-06 | -1.66589  |
| PCDH7     | 5.69E-05 | -1.660022 |
| DOCK4     | 5.85E-06 | -1.659426 |
| SLC16A2   | 2.13E-06 | -1.654708 |
| SYTL2     | 2.69E-06 | -1.643225 |
| SGK1      | 1.39E-06 | -1.630228 |
| FZD7      | 1.5E-05  | -1.628322 |
| TBX3      | 1.39E-06 | -1.627989 |
| P4HB      | 3.85E-06 | -1.625335 |
| URM1      | 7.96E-06 | -1.615669 |
| TNFRSF11B | 1.19E-05 | -1.611439 |
| MAPK3     | 3.92E-06 | -1.606711 |
| DACT1     | 4.89E-05 | -1.599281 |

## CDK9-HU vs NT-HU Upregulated (&gt; 1.5 FC, P &lt; 0.05)

| Gene      | P Value  | FC       |
|-----------|----------|----------|
| CD274     | 4.8E-06  | 2.737874 |
| LCP1      | 4.03E-09 | 2.690708 |
| SPP1      | 8.77E-09 | 2.586951 |
| KRT75     | 3.76E-07 | 2.480893 |
| PLSCR4    | 6.15E-07 | 2.20656  |
| FAM70A    | 9.53E-08 | 2.119262 |
| CLGN      | 2.48E-05 | 2.117351 |
| TRY6      | 0.001342 | 2.098406 |
| TMEM40    | 4.55E-07 | 2.044354 |
| DMBT1     | 1.23E-06 | 2.031809 |
| KIAA0825  | 7.5E-06  | 1.948709 |
| KIAA0825  | 3.29E-06 | 1.947714 |
| TFEC      | 6.43E-06 | 1.934805 |
| FLJ13744  | 0.000666 | 1.933195 |
| NXP2      | 3.56E-07 | 1.925765 |
| PRKACB    | 1.13E-07 | 1.91373  |
| HIST1H2BK | 5.54E-06 | 1.903644 |
| CASP7     | 1.36E-07 | 1.890039 |
| CCL4L1    | 1.99E-05 | 1.878538 |
| CCL4L1    | 1.99E-05 | 1.878538 |
| LOC645261 | 4.51E-05 | 1.859556 |
| MLLT11    | 1.46E-07 | 1.845877 |
| NPPB      | 6.43E-06 | 1.843622 |
| IL8       | 1.37E-06 | 1.841857 |
| ADHFE1    | 1.42E-05 | 1.841214 |
| CCDC148   | 2.82E-06 | 1.839543 |
| PAPPA     | 2.53E-06 | 1.834992 |
| SCML2     | 5.2E-06  | 1.791915 |
| CYP24A1   | 1.2E-05  | 1.791264 |
| FBXO4     | 1.62E-06 | 1.787666 |
| SAR1B     | 5.79E-07 | 1.787419 |
| TNFSF15   | 5.28E-06 | 1.777391 |
| MFAP3     | 2.03E-06 | 1.769236 |
| MYBL1     | 1.71E-05 | 1.768044 |
| KRCC1     | 8.16E-05 | 1.764462 |
| HSDL2     | 8.64E-07 | 1.761313 |
| SCEL      | 7.89E-05 | 1.757984 |
| PRSS2     | 0.000186 | 1.749755 |
| KLHDC1    | 7.18E-06 | 1.749536 |
| HADH      | 6.63E-06 | 1.747039 |
| CHRN1     | 1.14E-06 | 1.745397 |
| WDR69     | 2.42E-06 | 1.744831 |
| LAPT15    | 8.07E-06 | 1.744128 |
| GPX3      | 2E-06    | 1.74225  |
| SCML1     | 7.83E-06 | 1.736888 |
| AKR1B10   | 0.000928 | 1.722736 |
| TGM4      | 2.56E-06 | 1.715128 |
| PSG5      | 4.43E-06 | 1.714449 |
| SLC1A4    | 7.67E-07 | 1.706964 |
| RNF157    | 6.86E-05 | 1.693157 |
| CRYAB     | 4.93E-07 | 1.687456 |
| ANKRD46   | 1.1E-05  | 1.685326 |
| NUP210    | 2.65E-06 | 1.684152 |
| RASEF10   | 1.28E-06 | 1.681839 |
| CCL4L1    | 5.25E-05 | 1.678797 |
| SERPINB5  | 1.6E-05  | 1.674265 |
| PSG4      | 6.2E-06  | 1.666654 |
| EPB41L4B  | 2.25E-05 | 1.664578 |
| PRRG4     | 0.000115 | 1.655344 |
| C9orf46   | 1.43E-05 | 1.653366 |
| RND3      | 6.49E-07 | 1.653348 |
| GLP2R     | 2.12E-06 | 1.649659 |
| LOC128102 | 4.81E-05 | 1.636683 |
| ANXA3     | 1.18E-05 | 1.62787  |
| LPL       | 6.48E-06 | 1.627416 |
| IDH1      | 4.38E-06 | 1.626439 |
| FST       | 4.37E-06 | 1.622643 |
| MYH15     | 1.8E-05  | 1.621003 |
| PDGFC     | 6.22E-06 | 1.616506 |
| ARHGDI1   | 0.000155 | 1.616154 |
| CYP4F11   | 1.85E-05 | 1.609601 |
| TRIM16L   | 1.91E-06 | 1.609431 |
| ITGB3     | 3.71E-06 | 1.603358 |
| C5        | 3.56E-06 | 1.59791  |
| GPR126    | 0.000157 | 1.596574 |
| KCNJ15    | 0.00032  | 1.595138 |
| GNAQ      | 0.002037 | 1.591135 |
| C10orf88  | 5.74E-05 | 1.581955 |
| RECK      | 3E-05    | 1.581377 |

|          |          |           |             |          |          |
|----------|----------|-----------|-------------|----------|----------|
| IRS1     | 1.7E-06  | -1.590049 | SLC7A2      | 4.27E-06 | 1.581085 |
| EPHA5    | 4.08E-05 | -1.589325 | RP11-195B21 | 0.0002   | 1.579917 |
| DBP      | 3.93E-05 | -1.585163 | SLC4A4      | 2.9E-05  | 1.579522 |
| RAB35    | 5.06E-06 | -1.577567 | ZNF483      | 0.00011  | 1.572603 |
| MEF2C    | 8.01E-05 | -1.576921 | GPD2        | 3.57E-05 | 1.568172 |
| IGF2     | 0.000218 | -1.576789 | FRRS1       | 7.12E-06 | 1.562381 |
| CPE      | 3.89E-06 | -1.576045 | KLRA1       | 9.62E-05 | 1.558884 |
| FAP      | 0.000762 | -1.575621 | ARNTL       | 1.15E-05 | 1.555876 |
| IGFL2    | 8.15E-06 | -1.570975 | JPH1        | 8.22E-05 | 1.555216 |
| PDGFRA   | 5.96E-05 | -1.570337 | C14orf149   | 4.25E-06 | 1.553782 |
| PCDHB8   | 0.000441 | -1.569253 | TMEM116     | 1.46E-05 | 1.55312  |
| SOX4     | 1.61E-06 | -1.565113 | LOC63920    | 0.001021 | 1.550884 |
| GTDC1    | 0.000105 | -1.564769 | ITGA6       | 6.18E-06 | 1.545318 |
| PPIL3    | 1.82E-05 | -1.563413 | LOC441233   | 0.114554 | 1.544316 |
| KRT23    | 3.98E-05 | -1.554575 | SMAP2       | 4.35E-06 | 1.544106 |
| HMCN1    | 5.39E-05 | -1.554401 | GK          | 3.49E-06 | 1.542688 |
| EVI1     | 7.3E-05  | -1.553799 | ADAMTS1     | 1.6E-05  | 1.542642 |
| SEMA3D   | 0.004603 | -1.551266 | PCGF5       | 3.9E-06  | 1.539666 |
| PSMAL    | 7.81E-05 | -1.544893 | ACSL5       | 0.001133 | 1.539213 |
| ENPP1    | 4.71E-05 | -1.542921 | TTL7        | 6.91E-06 | 1.538393 |
| TRIM59   | 0.001619 | -1.542314 | RNF146      | 1.14E-05 | 1.536979 |
| SLIT2    | 1.65E-05 | -1.541595 | ACTA2       | 0.000279 | 1.535381 |
| ID1      | 5.43E-05 | -1.536005 | STK31       | 1.87E-06 | 1.53527  |
| ORM2     | 0.022822 | -1.530267 | PSG3        | 0.011505 | 1.534906 |
| PCDHB10  | 0.000125 | -1.528966 | AP1S3       | 0.000102 | 1.533445 |
| GNG2     | 0.000281 | -1.528284 | MAPK9       | 8.37E-06 | 1.533254 |
| FOXO4    | 0.000135 | -1.526368 | MAOA        | 3.16E-06 | 1.532269 |
| RAB27B   | 0.0001   | -1.526017 | GK          | 2.08E-05 | 1.531124 |
| DOK5     | 3.52E-05 | -1.525936 | CEPT1       | 1.99E-05 | 1.529996 |
| CDH6     | 4.53E-05 | -1.524842 | SLC22A5     | 1.26E-05 | 1.529462 |
| ZCCHC5   | 4.3E-05  | -1.524151 | NLRP10      | 1.74E-05 | 1.526777 |
| GRAMD3   | 6.58E-05 | -1.523937 | C17orf39    | 4.17E-05 | 1.525584 |
| LGR4     | 5.97E-05 | -1.521714 | TMEM64      | 2.15E-06 | 1.524959 |
| IGFBP5   | 3.11E-06 | -1.52036  | SLC7A6      | 5.44E-06 | 1.524664 |
| SNORD25  | 0.002875 | -1.520047 | APOBEC3H    | 3.95E-05 | 1.522409 |
| MICA     | 2.54E-05 | -1.517975 | CCDC111     | 0.00018  | 1.521772 |
| ARHGEF3  | 2.79E-05 | -1.51734  | CDC6        | 3.71E-06 | 1.521393 |
| PAGE2B   | 4.24E-06 | -1.51731  | AFAP1L2     | 2.26E-05 | 1.520509 |
| EPYC     | 3.2E-05  | -1.515867 | CLCN4       | 6.15E-06 | 1.520031 |
| SNAI2    | 1.63E-05 | -1.515434 | CCNE2       | 3.63E-05 | 1.516388 |
| TOX      | 0.002184 | -1.515281 | C12orf39    | 0.000405 | 1.515734 |
| PRICKLE1 | 2.09E-06 | -1.512513 | PHF11       | 0.00074  | 1.515323 |
| TMEM150  | 6.4E-05  | -1.512001 | C14orf45    | 0.000332 | 1.515106 |
| JARID1B  | 1.26E-05 | -1.511829 | KBTBD8      | 0.00013  | 1.513992 |
| CPM      | 0.00011  | -1.510835 | ENO2        | 1.62E-05 | 1.513291 |
| SAT1     | 0.00011  | -1.51017  | F2R         | 9.65E-06 | 1.512293 |
| CAMK2D   | 8.23E-06 | -1.508909 | LRRN4       | 4.38E-06 | 1.511664 |
| H1FO     | 4.24E-06 | -1.505709 | PKD2        | 5.25E-06 | 1.510593 |
| HIST1H1A | 1.27E-05 | -1.501856 | SRR         | 0.000111 | 1.508    |
|          |          |           | MAPRE3      | 1.96E-05 | 1.505874 |
|          |          |           | C8orf46     | 0.000158 | 1.502249 |
|          |          |           | DICER1      | 3.56E-06 | 1.501513 |
|          |          |           | BLVRB       | 1.39E-05 | 1.500307 |
|          |          |           | DPY19L2P2   | 0.001512 | 1.500037 |
